# Supplementary material for: PYL1- and PYL8-like ABA Receptors of Nicotiana benthamiana Play a Key Role in ABA Response in Seed and Vegetative Tissue
Source: MDPI journal article supplement (doi:10.3390/cells11050795), 2022-02-24

**Figure S2.** Chromatograms of the indicated gene sequences for wild-type and mutant plants. Sequence analysis reveals the different insertions (+1) or deletions ( $\Delta 1$ ,  $\Delta 2$ ,  $\Delta 4$ ,  $\Delta 24$ ) detected in the CRISPR/Cas9-edited alleles of each ABA receptor

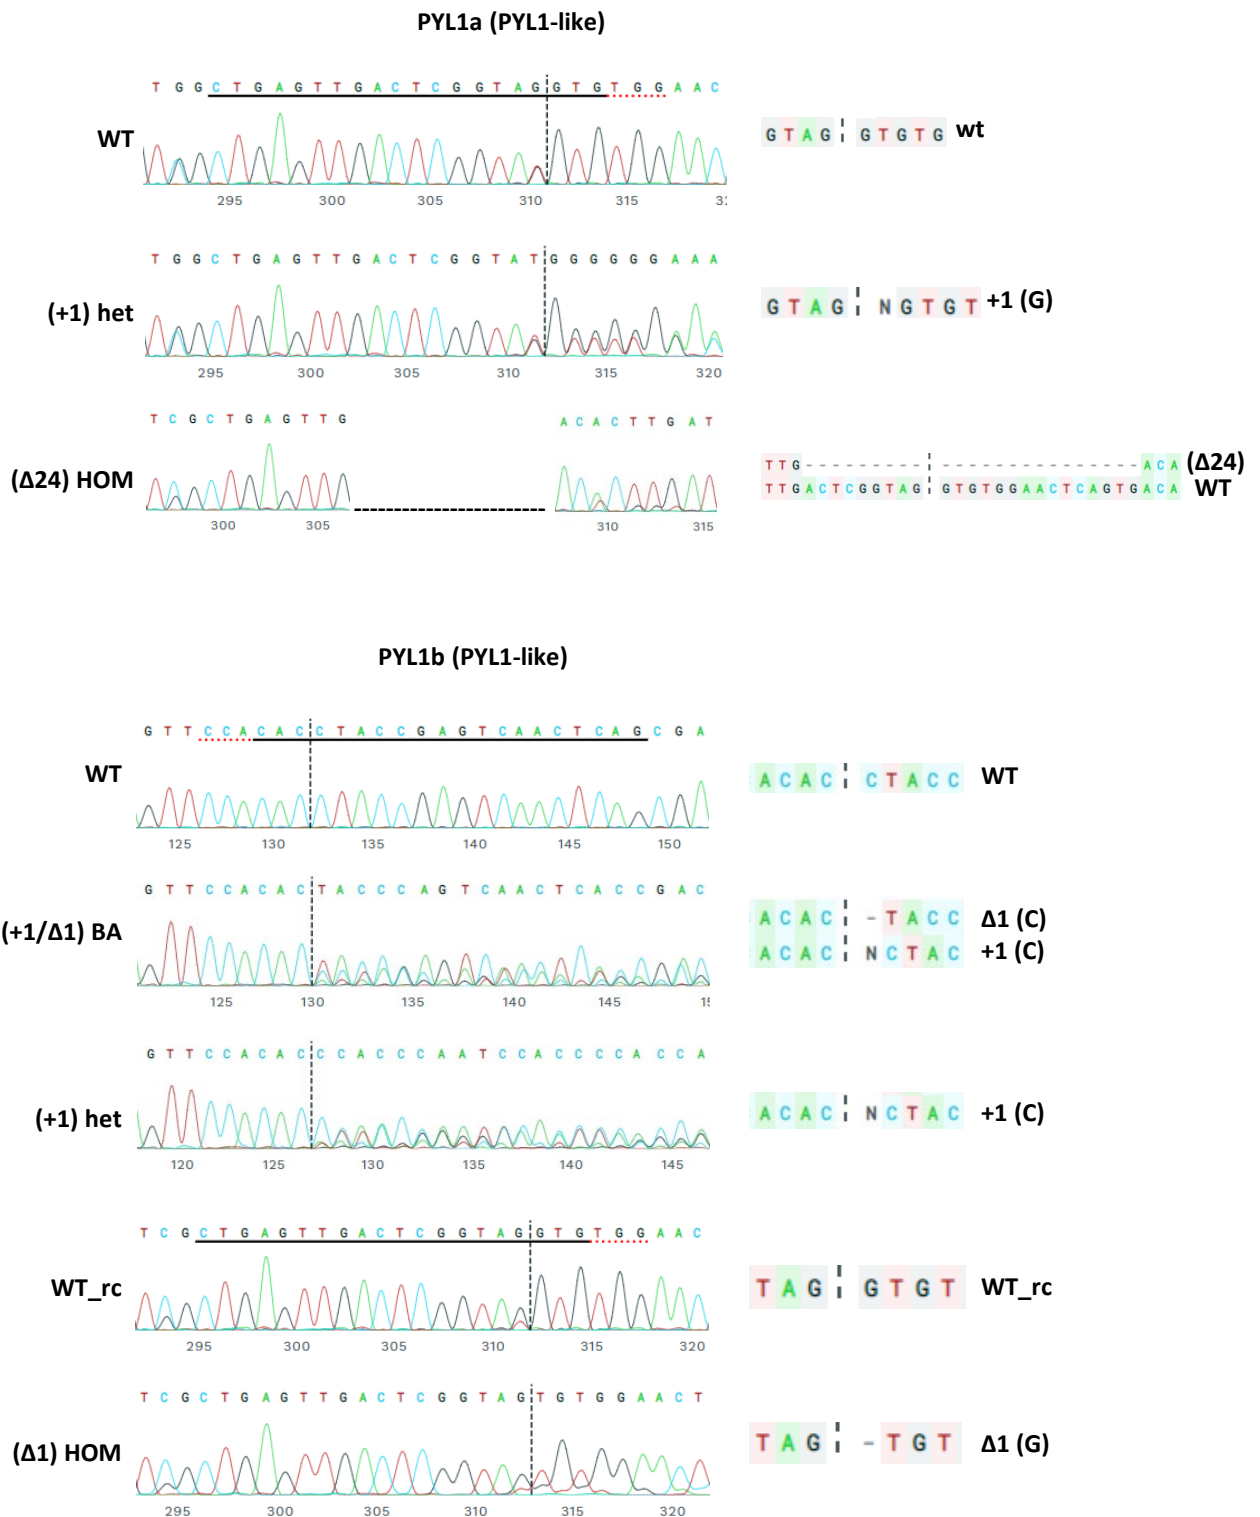

### PYL8a (PYL9-like)

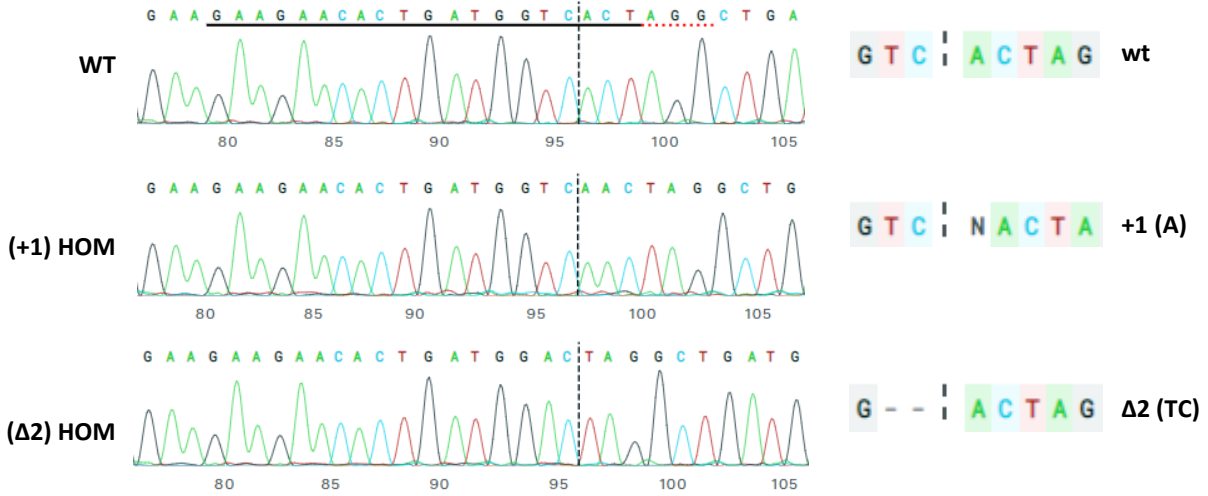

### PYL8b (PYL9-like)

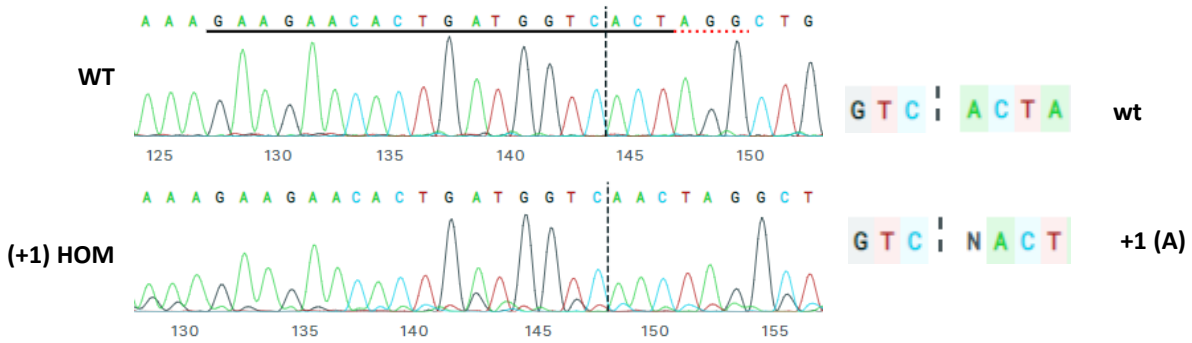

### PYL8c (PYL8-like)

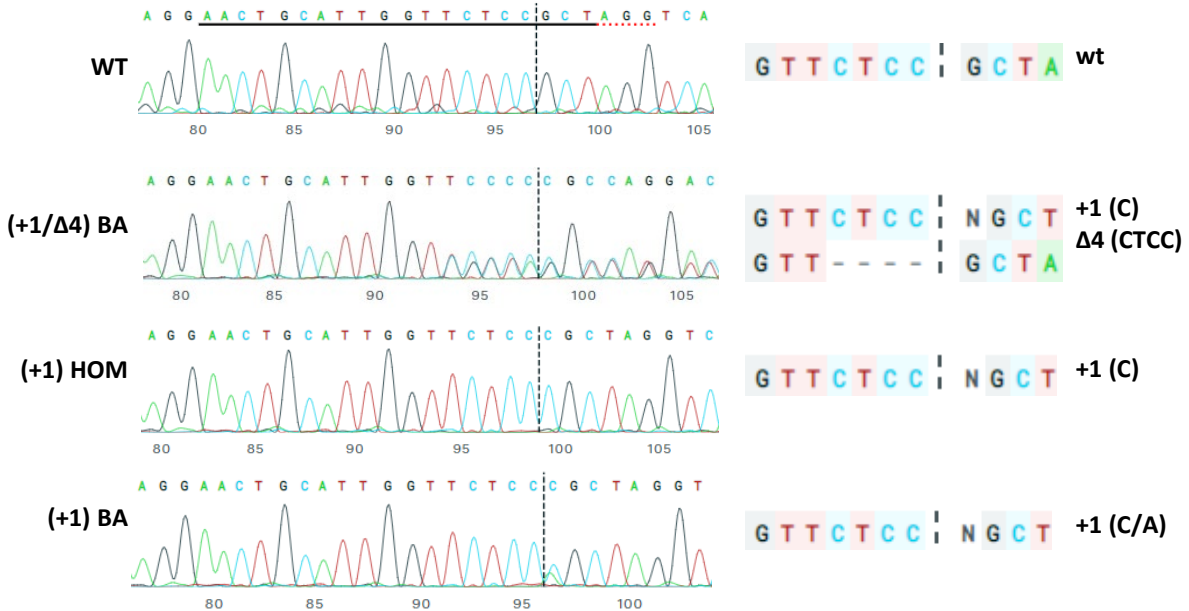

Supplement: s1 [file s1]
