# Supplementary material for: PYL1- and PYL8-like ABA Receptors of Nicotiana benthamiana Play a Key Role in ABA Response in Seed and Vegetative Tissue
Source: MDPI journal article supplement (doi:10.3390/cells11050795), 2022-02-24
Supplement: s1 [file s1]

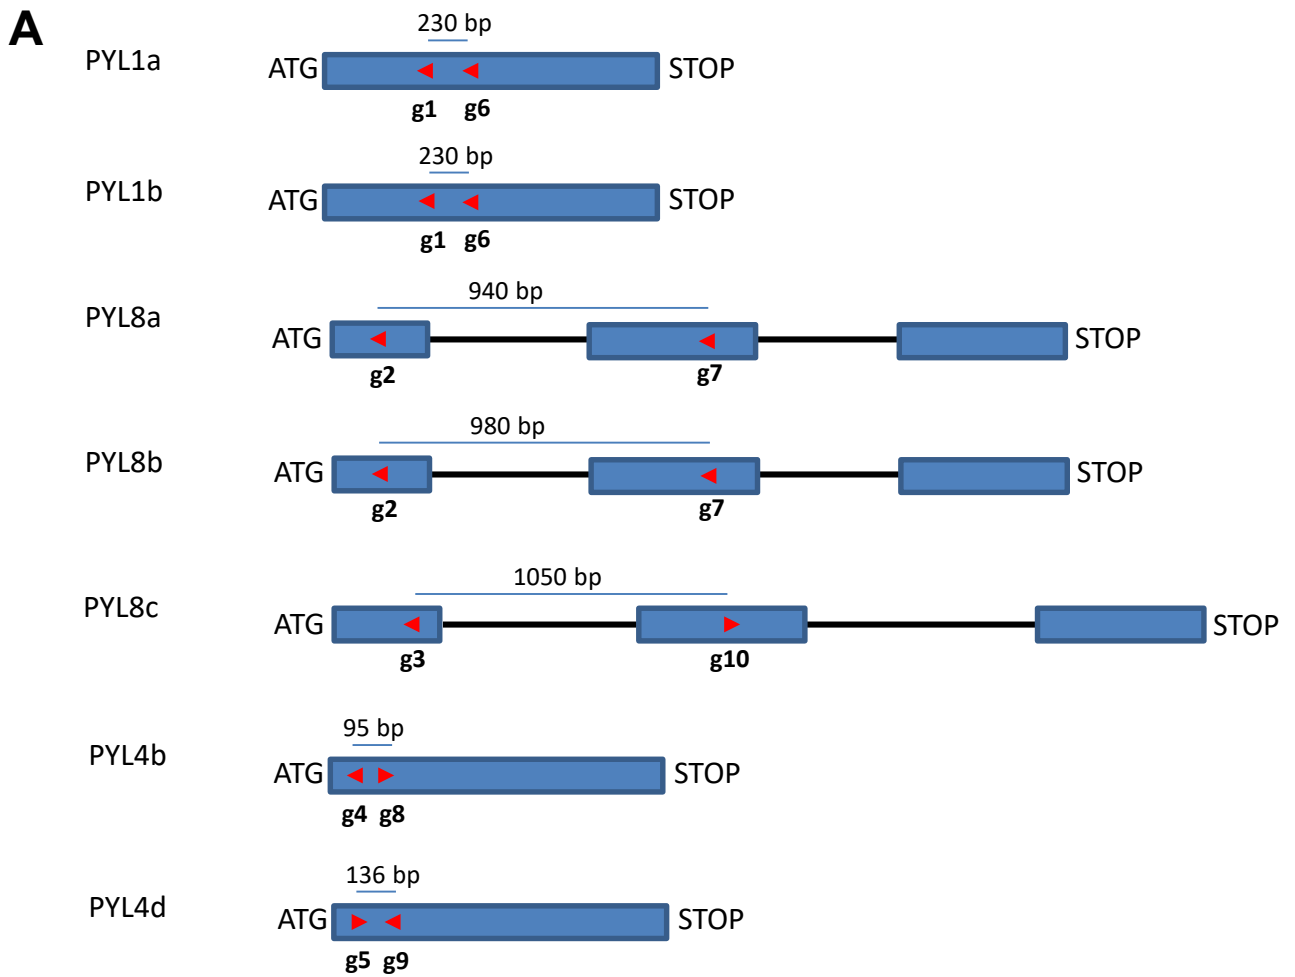

**B**

| Family      | Name  | Gene ID in database | Gene length (bp) | ORF length (bp) | Protein length (aa) |
|-------------|-------|---------------------|------------------|-----------------|---------------------|
| PYL1 like   | PYL1a | NbD001180           | 678              | 678             | 225                 |
| PYL1 like   | PYL1b | NbD012105           | 678              | 678             | 225                 |
| PYL8/9 like | PYL8a | NbD015117           | 1944             | 528             | 175                 |
| PYL8/9 like | PYL8b | NbD008843           | 2020             | 528             | 175                 |
| PYL8/9 like | PYL8c | NbD004872           | 3126             | 558             | 185                 |
| PYL4/5 like | PYL4b | NbD014593           | 642              | 642             | 213                 |
| PYL4/5 like | PYL4d | NbE03056248         | 636              | 636             | 212                 |

**Figure S1.** Target gene sequences and deduced protein size of the gene products. **(A)** Genomic structure of the 7 ABA receptor genes targeted in this study, indicating the gRNAs corresponding to each gene. **(B)** Nomenclature of the genes according to [www.nbent.com](http://www.nbent.com) database. Gene identity (ID), open reading frame (ORF) length from ATG to stop codon and protein length are indicated.
