# Supplementary figures and images for: PYL1- and PYL8-like ABA Receptors of Nicotiana benthamiana Play a Key Role in ABA Response in Seed and Vegetative Tissue
Source: MDPI journal article supplement (doi:10.3390/cells11050795), 2022-02-24

**A**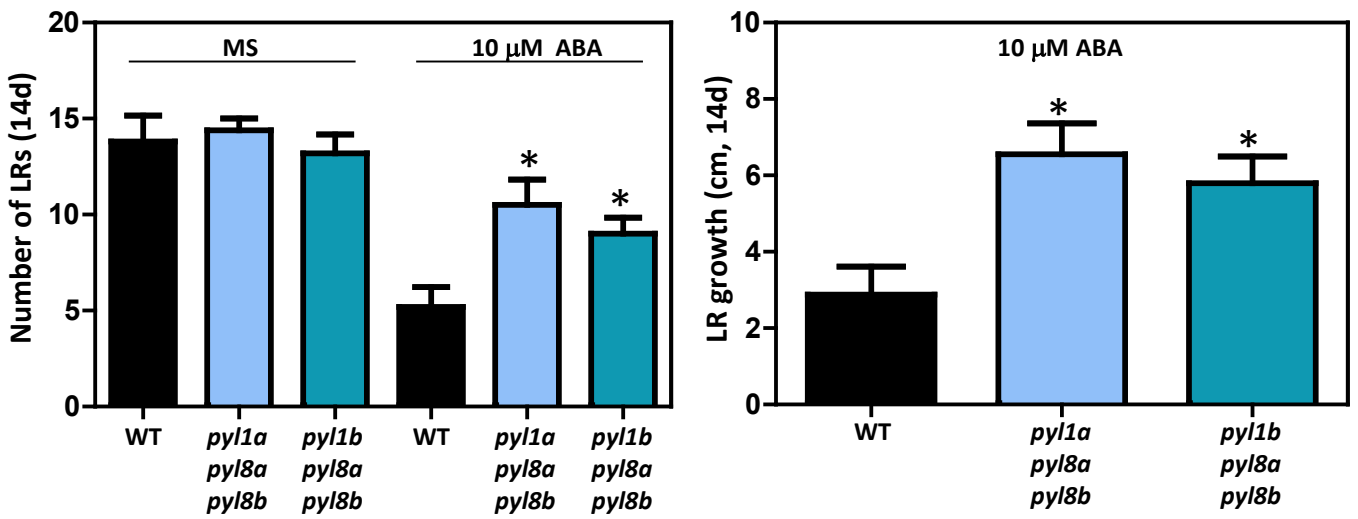**B**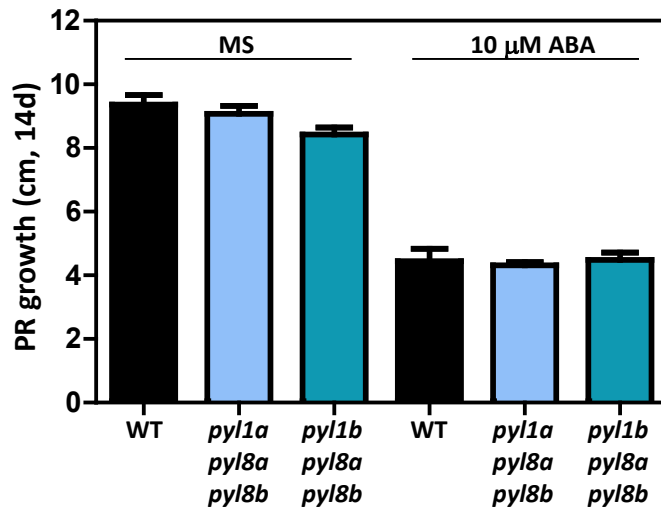

Supplement: s1 [file s1]
